# Supplementary material
Source: bioRxiv or medRxiv preprint supplement (https://www.biorxiv.org/content/biorxiv/early/2019/06/05/661660/DC2/embed/media-2.pdf)

Supplementary Figure 1

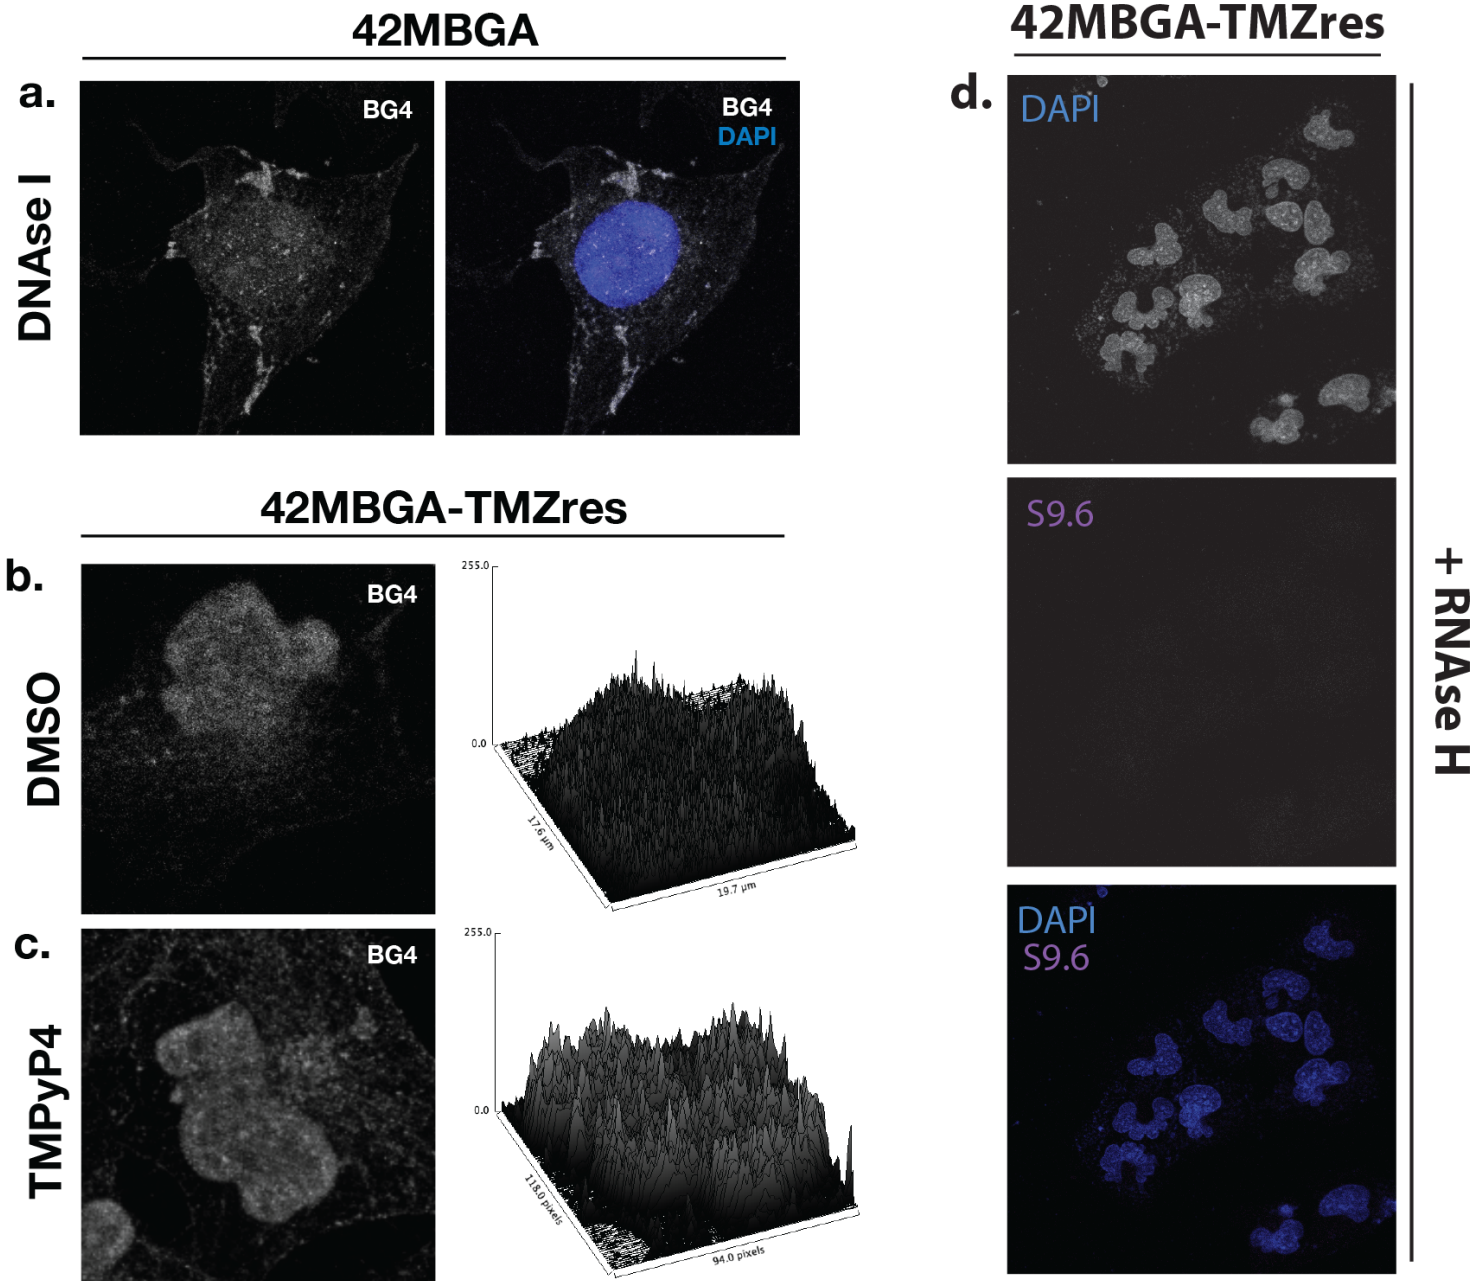

# Supplementary Figure 2

a.

| Kinase | Nanosyn %I |                   | SGC DSF<br>$\Delta T_m / ^\circ\text{C}$ | DiscoverX               |                   | RBC<br>IC <sub>50</sub> |
|--------|------------|-------------------|------------------------------------------|-------------------------|-------------------|-------------------------|
|        | 100 nM     | 1.0 $\mu\text{M}$ |                                          | PoC<br>@1 $\mu\text{M}$ | K <sub>D</sub>    |                         |
| CLK1   |            |                   |                                          | 2.90%                   | 26 nM             | 10 nM                   |
| CLK2   | 81%        | 96%               |                                          | 8.30%                   | 4.9 nM            | 0.73 nM                 |
| CLK3   | 4%         | 22%               | 0.4 $^\circ\text{C}$                     | 89%                     | nt                | nt                      |
| CLK4   |            |                   | 5.8 $^\circ\text{C}$                     | 27%                     | 140 nM            | 8.8 nM                  |
| DYRK1A | 8%         | 22%               | 1.8 $^\circ\text{C}$                     | 73%                     | nt                | nt                      |
| DYRK1B | 5%         | 39%               |                                          | 81%                     | nt                | nt                      |
| DYRK2  | 1%         | 6%                | 2.1 $^\circ\text{C}$                     | 100%                    | nt                | nt                      |
| DYRK3  |            |                   |                                          |                         | nt                | > 10 $\mu\text{M}$      |
| DYRK4  |            |                   |                                          |                         | nt                | > 10 $\mu\text{M}$      |
| HIPK1  | 20%        | 62%               |                                          | 20%                     | 3.6 $\mu\text{M}$ | > 10 $\mu\text{M}$      |
| HIPK2  |            |                   |                                          | 27%                     | 530 nM            | nt                      |
| HIPK3  |            |                   |                                          | 74%                     | nt                | nt                      |
| HIPK4  | 4%         | 24%               |                                          | 76%                     | nt                | nt                      |
| SRPK1  | -1%        | -1%               | 0.4 $^\circ\text{C}$                     | 100%                    | nt                | nt                      |
| SRPK2  |            |                   | 0.1 $^\circ\text{C}$                     | 100%                    | nt                | nt                      |
| MSSK1  | 0%         | 0%                |                                          | 100%                    | nt                | nt                      |
| PRP4   |            |                   |                                          | 100%                    |                   |                         |
| STK16  |            |                   | 6.5 $^\circ\text{C}$                     | 6.90%                   | 210 nM            | 100 nM                  |
| ERK8   |            |                   |                                          | 4.40%                   | 35 nM             | 120 nM                  |
| NEK6   | 0%         | 2%                |                                          | 11%                     | 84 nM             | > 10 $\mu\text{M}$      |
| NEK7   | 3%         | 2%                |                                          | 19%                     | 140 nM            | > 10 $\mu\text{M}$      |

b.

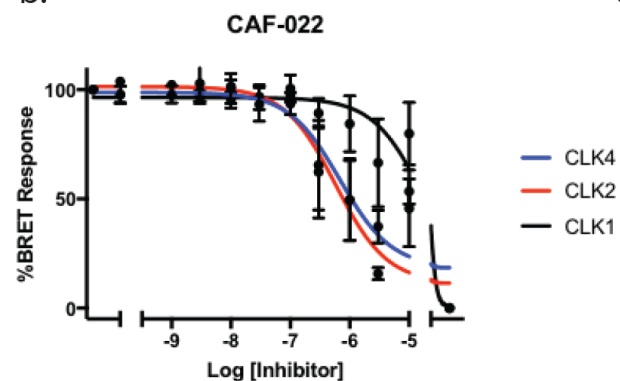

c.

| NanoBRET IC <sub>50</sub> s          |
|--------------------------------------|
| CLK1 IC <sub>50</sub> = >10,000 nM   |
| <b>CLK2 IC<sub>50</sub> = 580 nM</b> |
| CLK4 IC <sub>50</sub> = 690 nM       |

d.

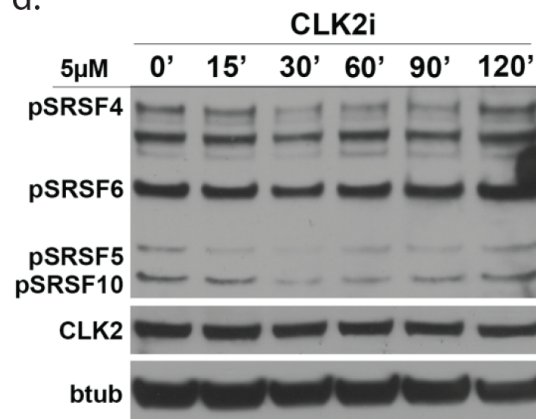

e.

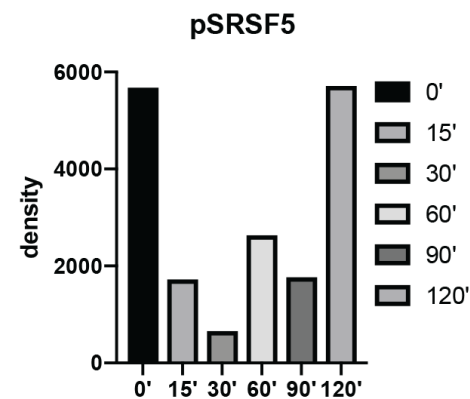

# Supplementary Figure 3

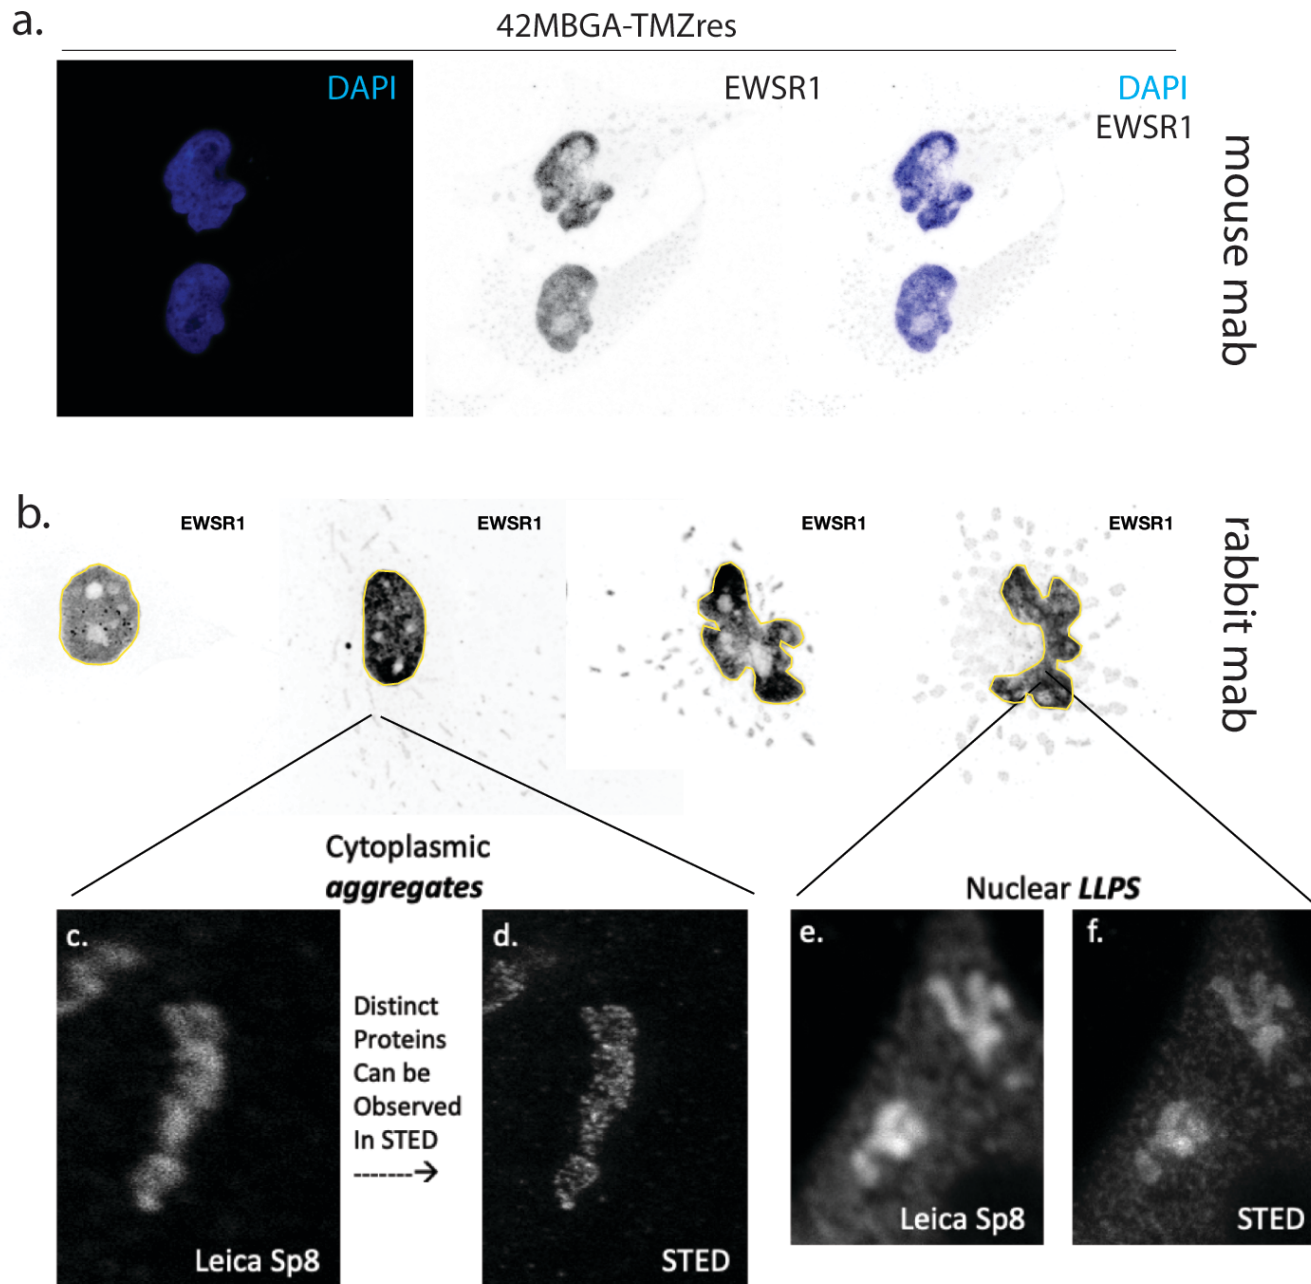

Supplementary Figure 4

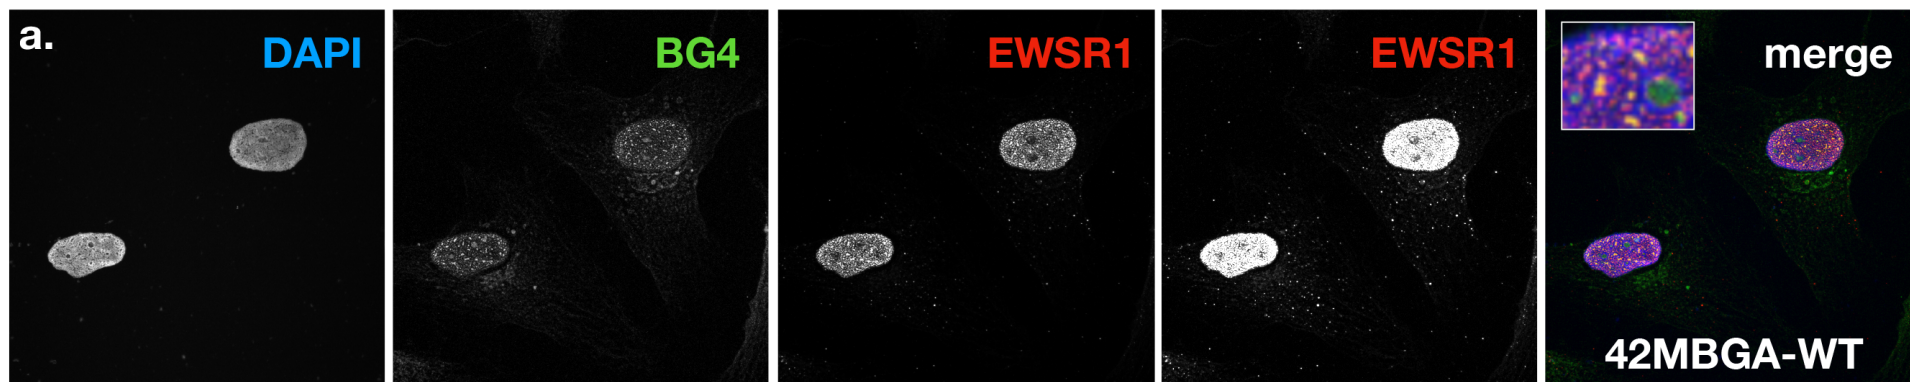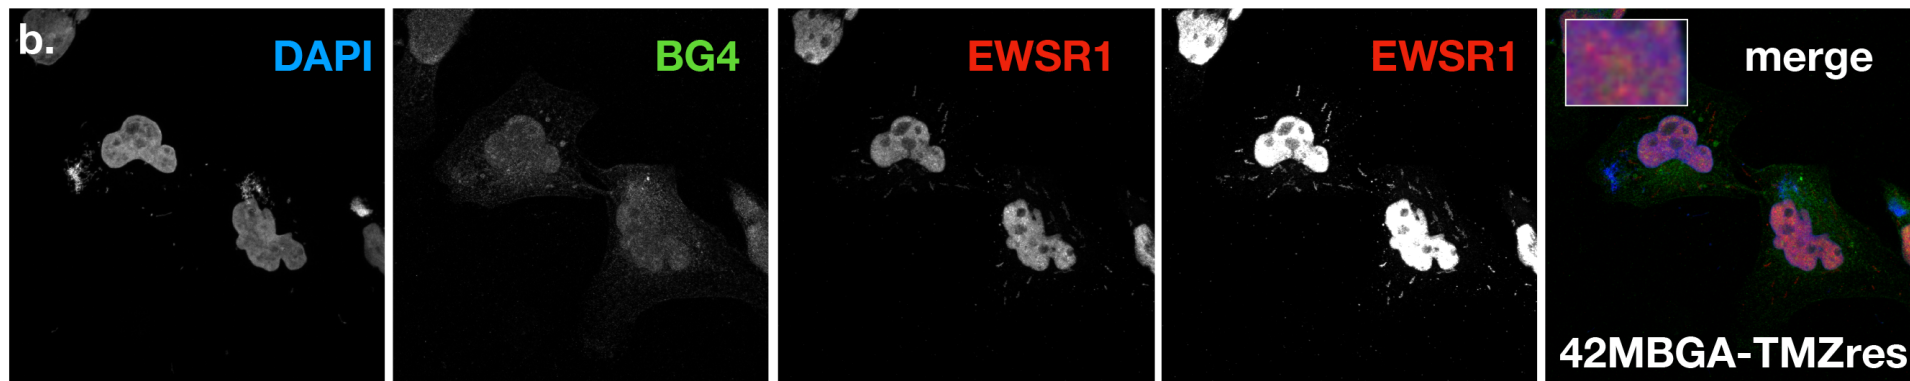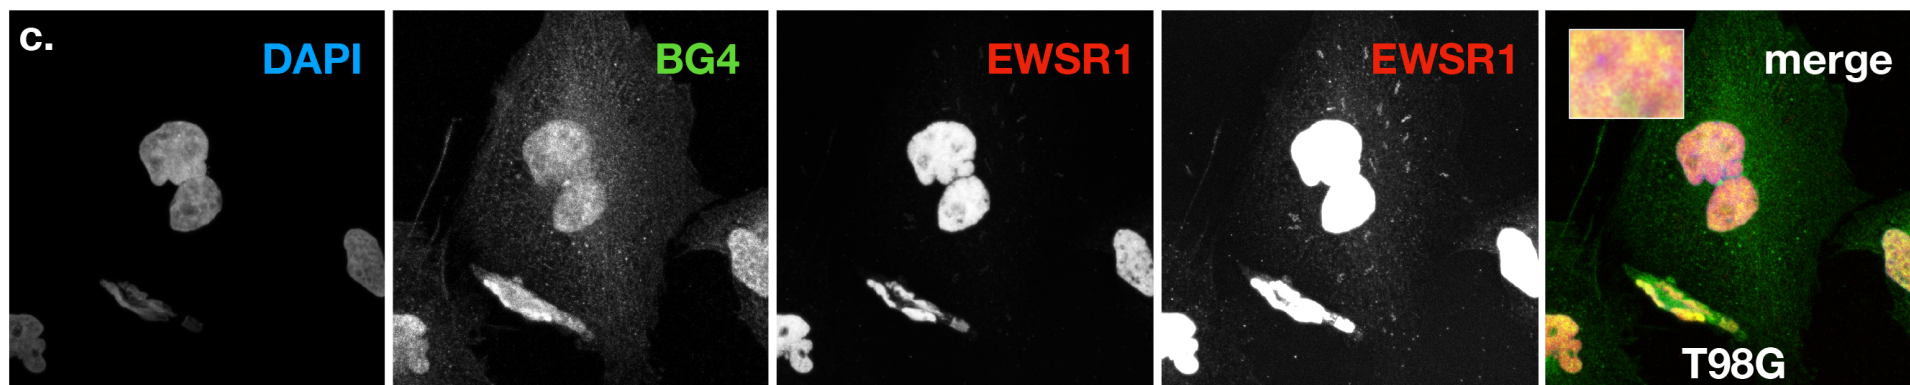

enhanced\*

# Supplementary Figure 5

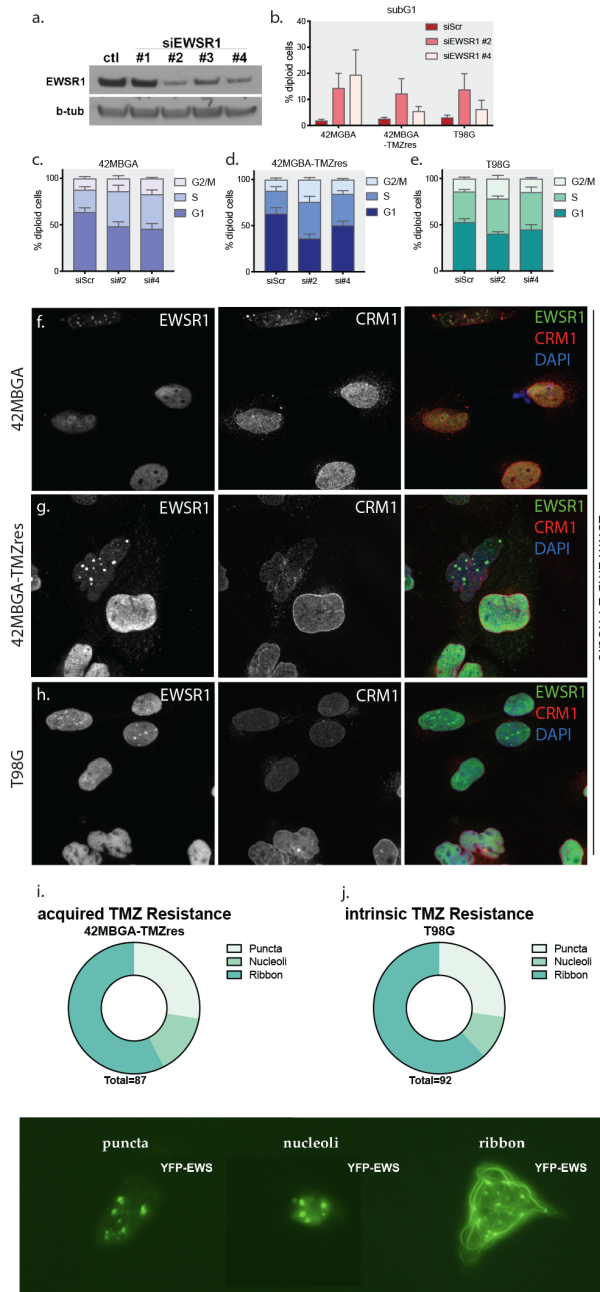

# Supplementary Figure 6

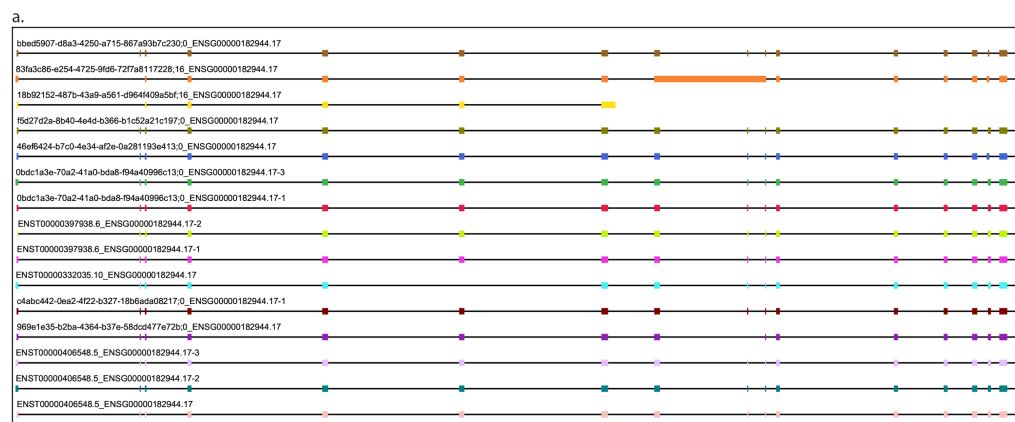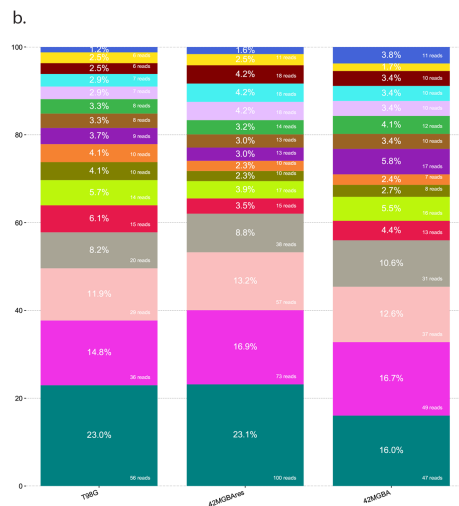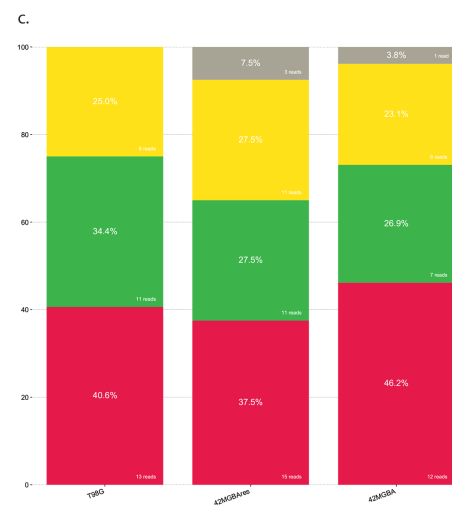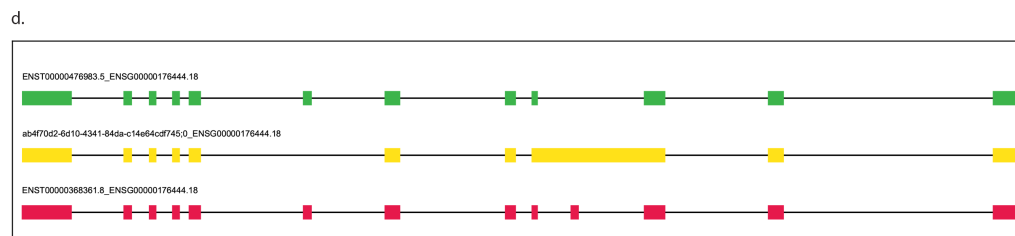

Supplement: Supplementary file [file media-2.pdf]
